# Supplementary material for: Genetic status of KRAS modulates the role of Neuropilin-1 in tumorigenesis
Source: PubMed Central journal article supplement (PMC5635066; doi:10.1038/s41598-017-12992-2), 2017-10-10
Supplement: 41598_2017_12992_MOESM1_ESM.pdf [file 41598_2017_12992_MOESM1_ESM.pdf]

# Genetic status of *KRAS* modulates the role of Neuropilin-1 in tumorigenesis

Sneha Vivekanandhan<sup>1,2,\$</sup>, Lijuan Yang<sup>1,\$</sup>, Ying Cao<sup>1</sup>, Engfeng Wang<sup>1,2</sup>  
Shamit K. Dutta<sup>1,2</sup>, Anil K. Sharma<sup>1,2</sup>, Debabrata Mukhopadhyay<sup>1,2,\*</sup>

Department of Biochemistry and Molecular Biology, Mayo Clinic College of Medicine and Sciences, Rochester<sup>1</sup>, MN and Jacksonville<sup>2</sup>, FL. USA

\$ The first two authors contributed equally.

\* Corresponding Author

Debabrata Mukhopadhyay, PhD, Department of Biochemistry and Molecular Biology, Mayo Clinic, 4500 San Pablo Rd Jacksonville, FL 32224

Email: mukhopadhyay.debabrata@mayo.edu

# Supplementary Figure 1

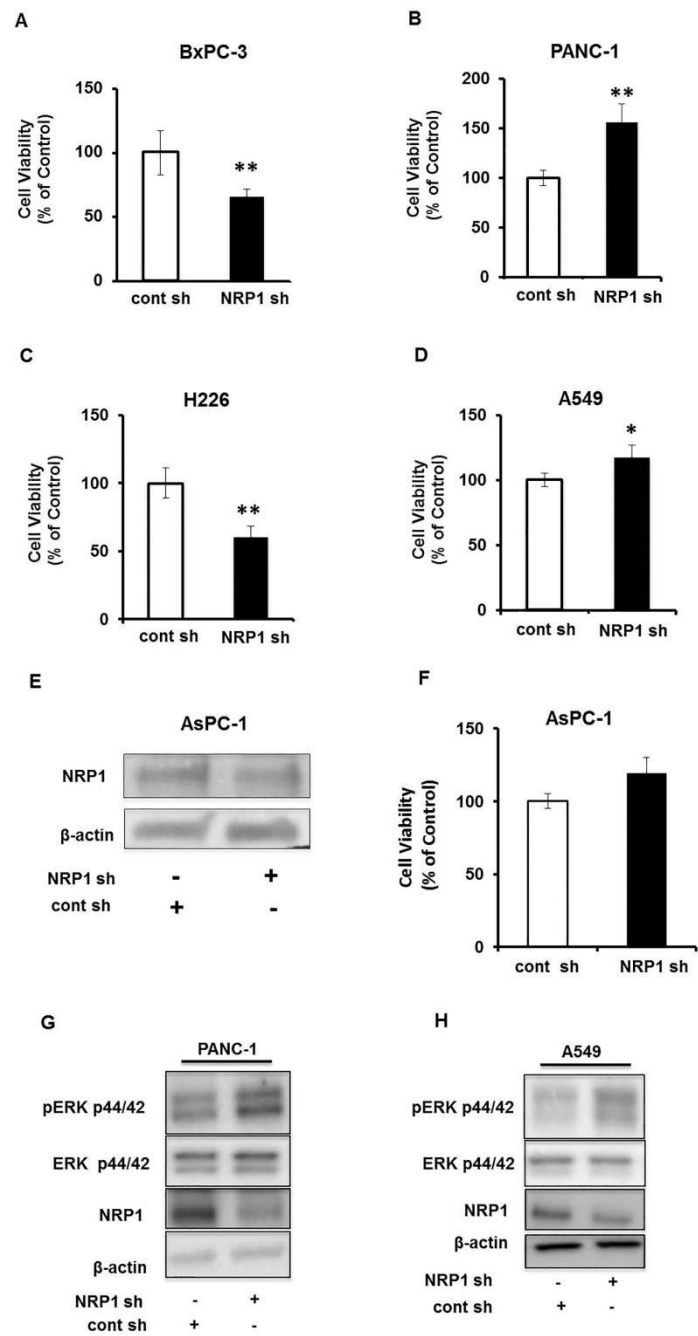

Supplementary Figure 2

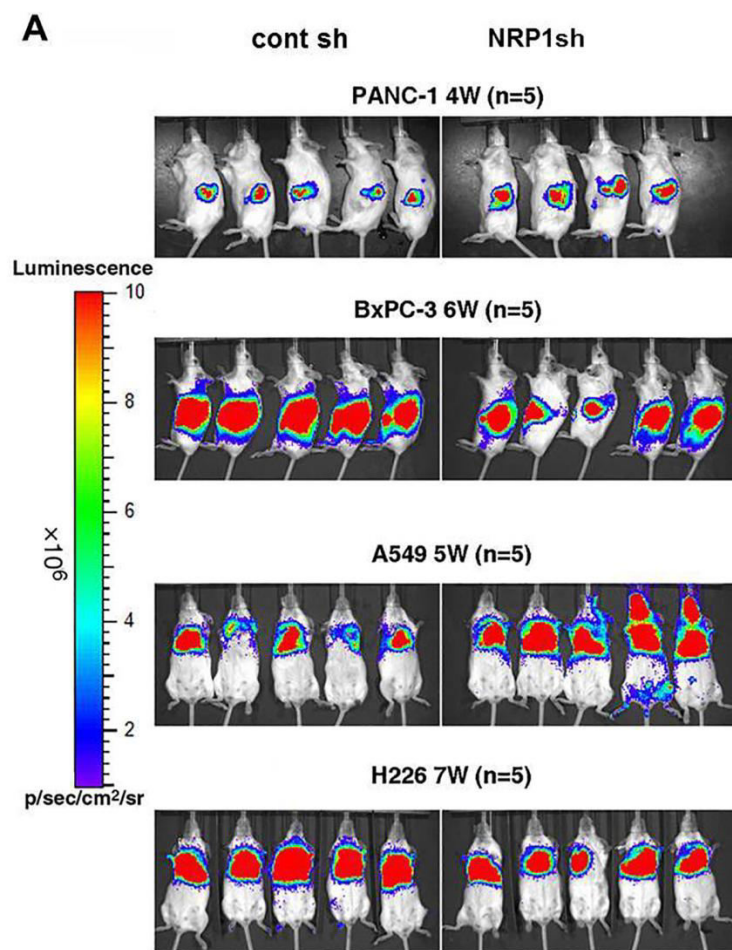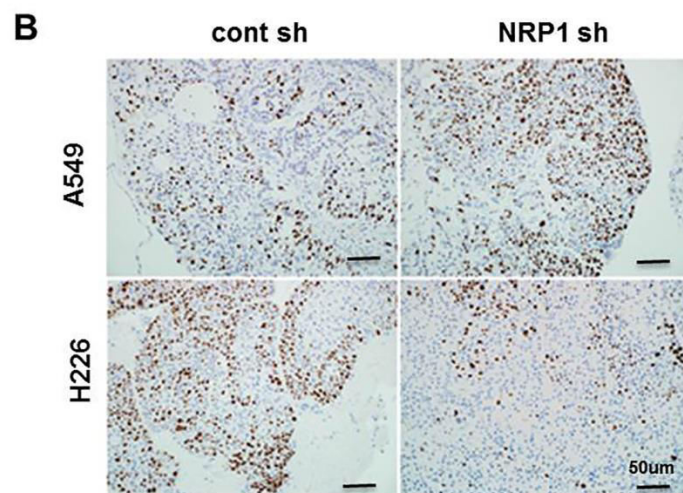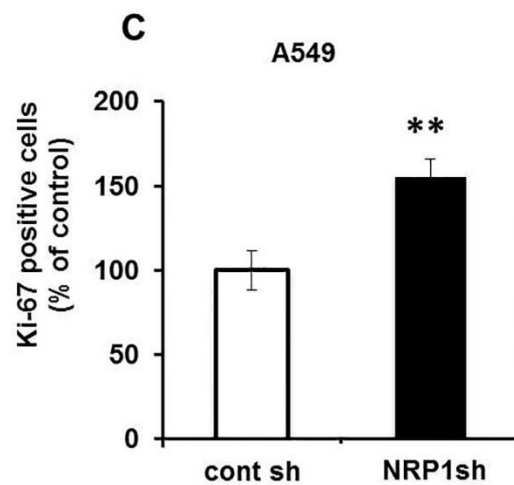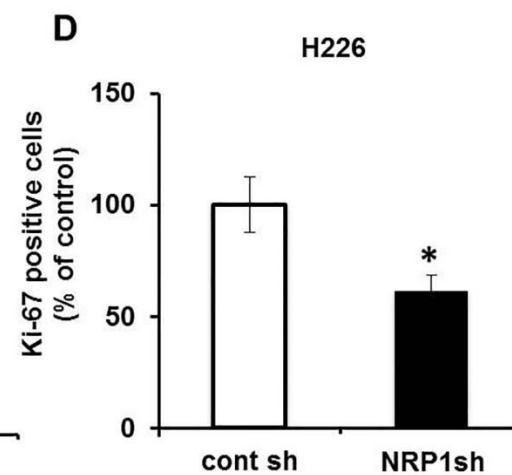

Supplementary Figure 3

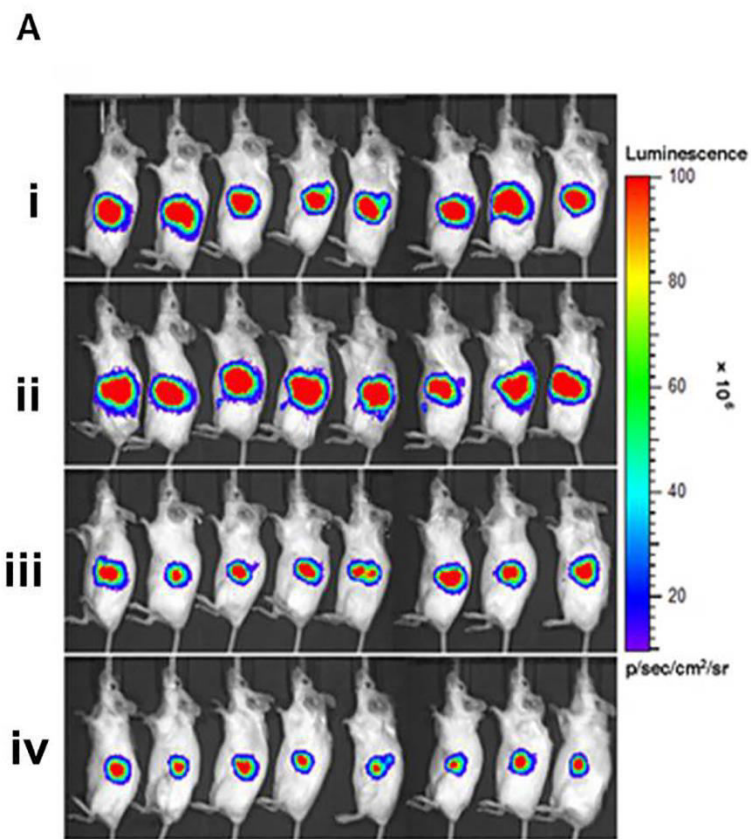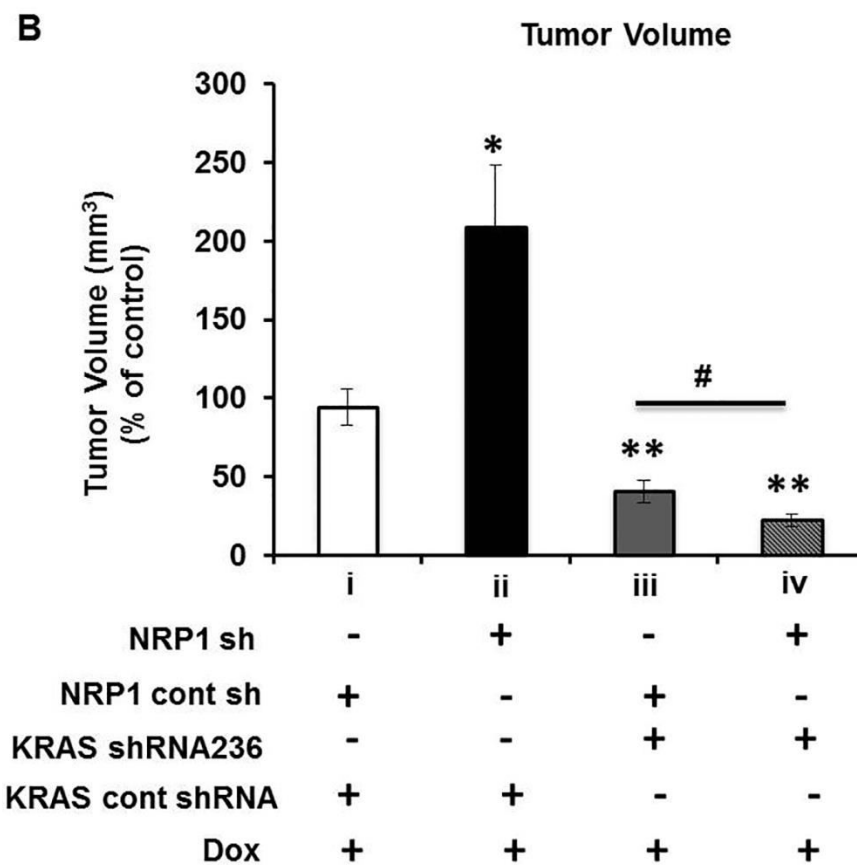

Supplementary Figure 4

A

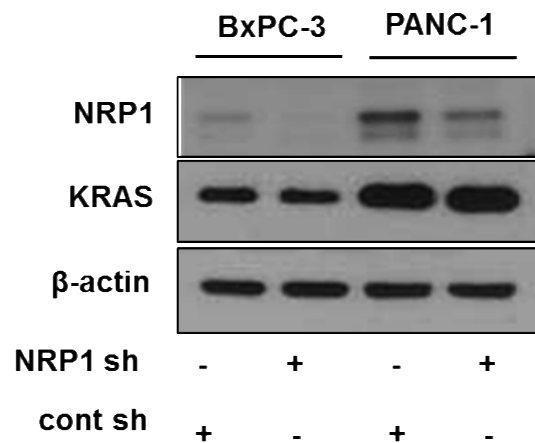

B

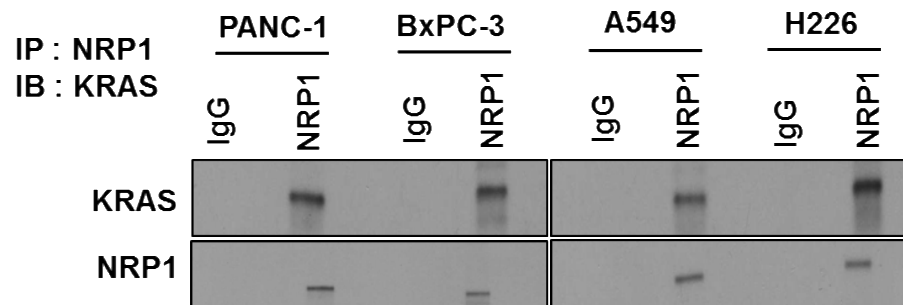

C

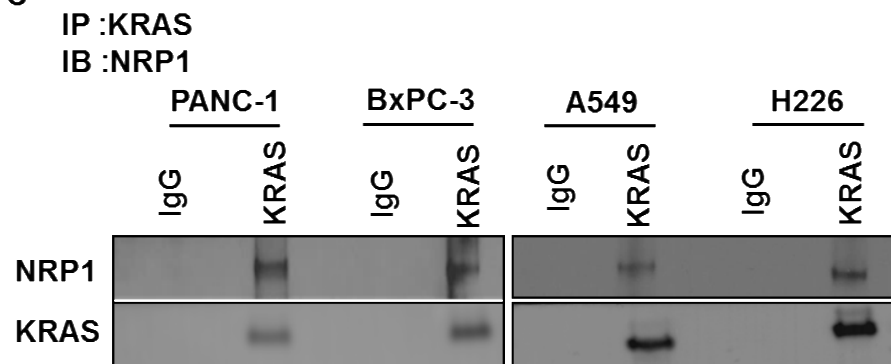

Supplementary Figure 5

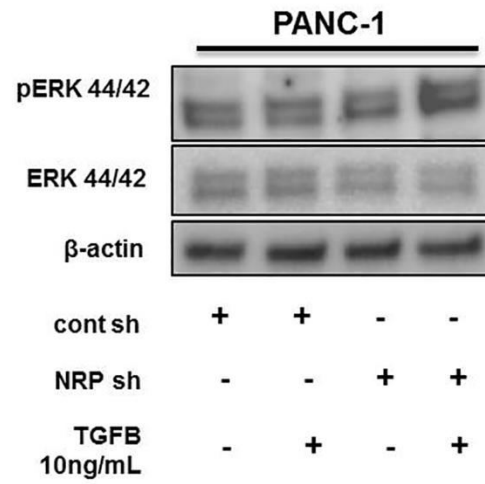

Supplementary Figure 6

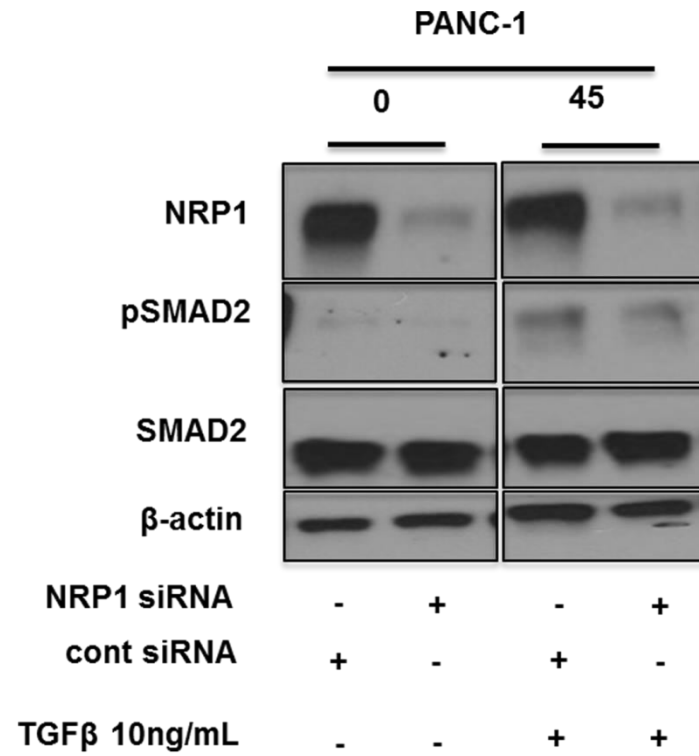

Supplementary Figure 7

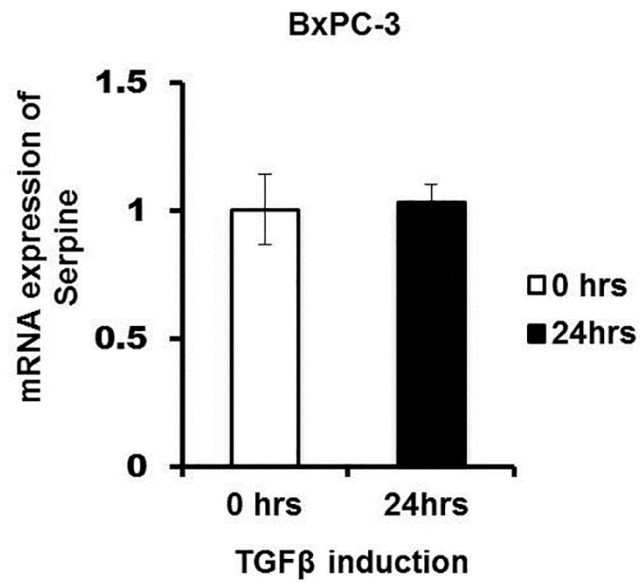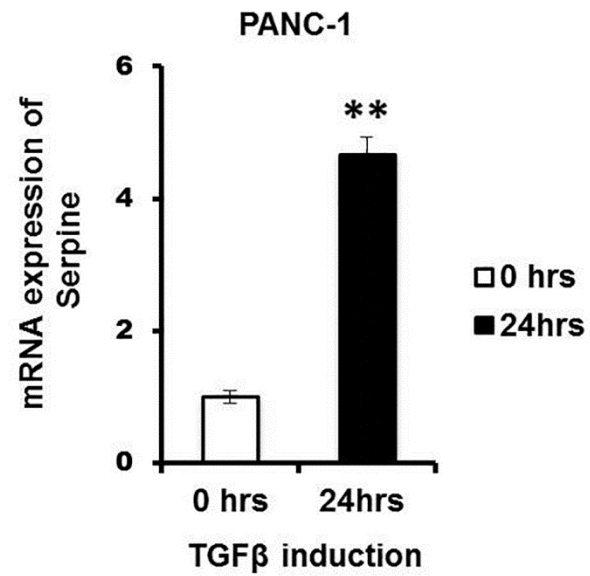



Supplementary Figure 8

**A**

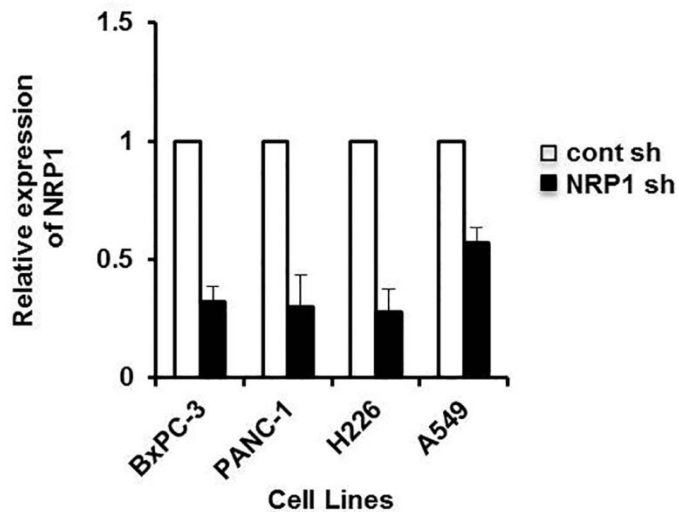

**B**

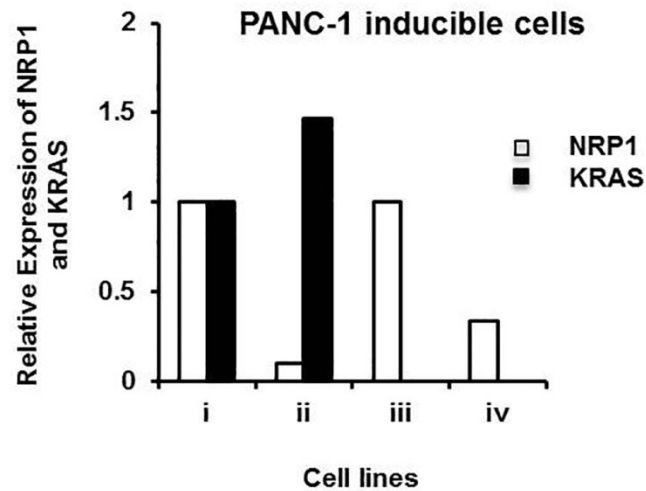

**C**

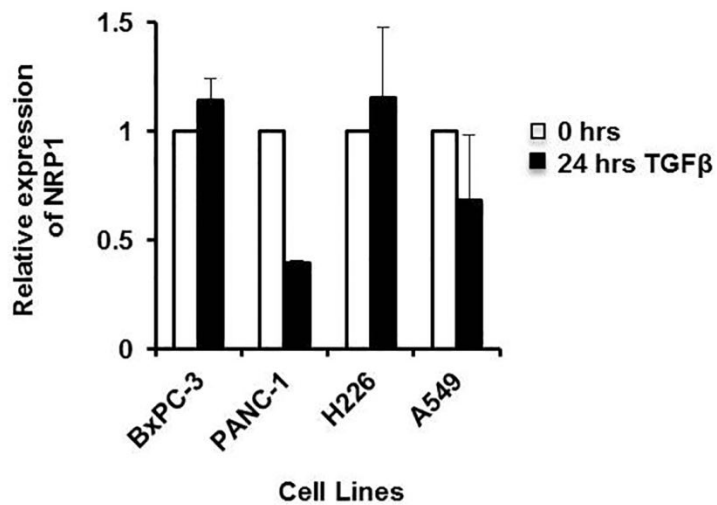

**D**

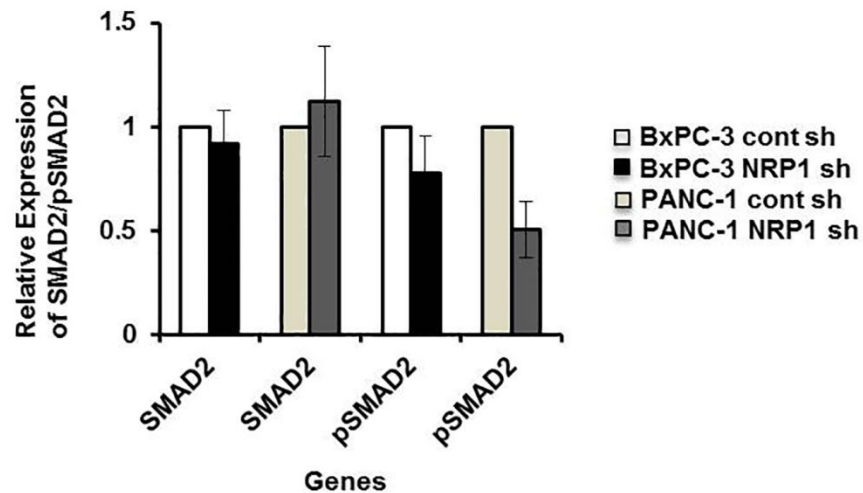

## Supplementary Figures

### **S1: Oncogenic KRAS influences the role of NRP1 in tumorigenesis in pancreatic and lung cancers**

**S1 (A-D):** Cell viability for different PDAC and NSCLC cell lines with NRP1 knockdown grown in 2D culture for 72 hours. Data are plotted as percentage of untreated control cells. A representative experiment out of three is shown. All data are presented as the mean  $\pm$  SD of three independent experiments. Significant differences: \* $p < 0.05$  vs. control group, \*\* $p < 0.01$  vs. control group). **(E)** Western-blot analysis of NRP1 knockdown levels in PDAC cell line AsPC-1. **(F)** Cell viability for AsPC-1 with the reduced NRP1 expression grown in 3D culture for 72 hours. **(G-H)** Western blot analysis of total and phosphorylated form of ERK p44/42 in PANC-1 and A549 cell lines with and without NRP1 knockdown.

### **S2: Role of NRP1 in tumorigenesis is different in wild-type vs mutant KRAS tumor models**

**S2 (A):** Representative bioluminescent imaging of orthotopic SCID mice models implanted with different PDAC and NSCLC cells with NRP1 knockdown ( $n=5$ ). **(B-D)** Immunohistochemistry staining for Ki-67 in different lung cancer cell lines with/out NRP1 knockdown and quantification of digital images for Ki-67 at 20X magnification. Significant differences: \* $p < 0.05$  vs. control group, \*\* $p < 0.01$  vs. control group.

### **S3: The role of NRP1 on tumorigenesis is oncogene KRAS dependent**

**S3 (A):** Representative bioluminescent imaging of SCID mice orthotopically implanted with PANC-1 cells transfected: group (i) with NRP1 control- and KRAS control-shRNA; group (ii) with NRP1-shRNA and KRAS control-shRNA; group (iii) KRAS shRNA NRP1 control-shRNA and group (iv) KRAS shRNA and NRP1shRNA. **(B)** Comparison of tumor volume for the isolated tumors, representative data is shown for 8 animals in each group.

\*  $P < .05$  vs control; \*\*  $P < .01$  vs control. #  $P < .05$ ; ##  $P < .01$  between groups (iii) and (iv).

### **S4: NRP1 and KRAS are present in the same immunocomplex**

**S4 (A)** Western blot showing levels of KRAS in PDAC cell lines with and without NRP1 reduced expression. **(B-C)** Coimmunoprecipitation assays showing that NRP1 and KRAS are present in the same immunocomplex.

### **S5: TGF $\beta$ induction increases phosphorylation of ERK44/42 in PANC-1 cells with reduced NRP1 expression**

Western blot analysis showing levels of phosphorylated and total ERK in PANC-1 cells with and without NRP1 knockdown post 24hrs TGF $\beta$  treatment.

**S6: TGF $\beta$  stimulation decreases phosphorylation of SMAD2 in PANC-1 cells with reduced NRP1 expression**

Western blot showing levels of total and phosphoSMAD2 in PANC-1 cells treated with control or NRP1 siRNA 45mins after TGF $\beta$  stimulation.

**S7: TGF $\beta$  induction increases mRNA expression levels of Serpine in PANC-1 cells**

Real time quantifications of Serpine expression in pancreatic cancer cell lines with and without TGF $\beta$  induction for 24hrs.

\*p<0.05 vs. control group, \*\*p<0.01 vs. control group.

**S8: Quantifications of the western blots used**

(A) Quantification for the western blots showing the reduced expression of NRP1 in PDAC and NSCLC cells. (B)

Densitometry analysis for the western blots showing levels of NRP1 and KRAS in doxycycline inducible PANC-1 cells. (C)

Quantification for the western blots showing the expression of NRP1 in PDAC and NSCLC cells post 24hrsTGF $\beta$  treatment.

(D) Quantification for the western blots showing levels of total and phosphorylated SMAD2 in PDAC cell lines with and without reduced NRP1 expression.

**Supplemental table 1: *KRAS* mutation status of associated cell lines and effect of NRP1 silencing on tumorigenesis**

| <b>Tumor type</b> | <b>Cell type</b> | <b><i>KRAS</i><br/>mutation status</b> | <b>Result</b>                                  |
|-------------------|------------------|----------------------------------------|------------------------------------------------|
| Pancreatic cancer | PANC-1           | MT                                     | Reduced NRP1 expression promotes tumorigenesis |
|                   | AsPC-1           | MT                                     | Reduced NRP1 expression promotes tumorigenesis |
|                   | BxPC-3           | WT                                     | Reduced NRP1 expression inhibits tumorigenesis |
| Lung cancer       | A549             | MT                                     | Reduced NRP1 expression promotes tumorigenesis |
|                   | H226             | WT                                     | Reduced NRP1 expression inhibits tumorigenesis |

**Supplemental table 2: The role of NRP1 in tumorigenesis in different cancers**

| <b>Tumor type</b>          | <b>Cell type</b>              | <b>KRAS</b> | <b>Results</b>                                    | <b>Ref</b> |
|----------------------------|-------------------------------|-------------|---------------------------------------------------|------------|
| Neuroblastoma              | SK-N-DZ (DZ)<br>SK-N-AS (AS)  | WT          | Overexpression promotes tumorigenesis             | 19         |
| Glioma                     | U87MG                         | WT          | Overexpression of NRP1 promotes tumor growth      | 53         |
| Non-small cell lung cancer | CL1-0; CL1-1, CL1-5, CL1-5-F4 | WT          | Blockade of NRP1 suppresses tumor growth          | 11         |
| Pancreatic cancer          | PANC-1                        | MT          | Reduced NRP1 expression promotes tumorigenesis    | 17         |
| Prostate cancer            | AT2.1                         | WT          | Overexpression promotes tumorigenesis             | 15         |
| Breast cancer              | MCF-7                         | WT          | Inhibition of NRP1 reduces cellular proliferation | 22         |
| Osteosarcoma               | MG-63                         | WT          | Overexpression promotes tumorigenesis             | 21         |
| Hepatocellular carcinoma   | HCC-LM6                       | WT          | Reduced NRP1 expression inhibits tumorigenesis    | 20         |
| Renal cancer               | 786-O<br>A498                 | WT          | Reduced NRP1 expression inhibits tumorigenesis    | 12         |
| Colon cancer               | KM12                          | WT          | Overexpression promotes tumorigenesis             | 16         |

**Supplemental table 3: The sequences of siRNA and shRNA used in the study**

| <b>siRNA/shRNA</b> | <b>Target sequences</b>                                                                                             |
|--------------------|---------------------------------------------------------------------------------------------------------------------|
| NRP1 siRNA         | 5'-ACGGTCATAGACAGCACCATA-3'                                                                                         |
| NRP1 shRNA         | 5'-CCCTGTTGGTTTCATTTGAATA-3'                                                                                        |
| SMAD1 shRNA        | 5'-GCCGATGGACACAAACATGAT-3'                                                                                         |
| SMAD2 shRNA        | 5'-TGCTGTTGACAGTGAGCGAACTTG<br>AGGTCTCATCAATTAATAGTGAAGCCA<br>CAGATGTATTAATTGATGAGACCTCAAG<br>TGTGCCTACTGCCTCGGA-3' |
| SMAD3 shRNA        | 5'-CTGTGTGAGTTCGCCTTCAAT-3'                                                                                         |
| SMAD5 shRNA        | 5'-GCCTAAACATTGGTGTTCAT-3'                                                                                          |
| KRAS sh236:        | 5'-GATACAGCTAATTCAGAATC-3'                                                                                          |
| KRAS sh562:        | 5'-AGGCTCAGGACTTAGCAAGA-3';                                                                                         |
| KRAS cont          | 5'-GGATAATGGTGATTGAGATGG-3'.                                                                                        |
